# Supplementary material
Source: PubMed Central journal article supplement (PMC10793032)
Supplement: tpmd230478.SD1.pdf [file tpmd230478.SD1.pdf]

**Title**

Title of paper / abstract / report that data are extracted from

**Lead author****Country in which the study was conducted****Methods****Aim of study****Study design**

- Randomised controlled trial
- Non-randomised experimental study
- Cohort study
- Cross sectional study
- Case control study
- Systematic review
- Qualitative research
- Prevalence study
- Case series
- Case report
- Diagnostic test accuracy study
- Clinical prediction rule
- Economic evaluation
- Text and opinion
- Other

**Start date**

**End date**

**Publish year**

**Possible conflicts of interest for study authors**

**Participants**

**Population description**

**Total number of participants**

**For SMC: Medication and duration**

**Contextual Factors**

- Acceptability
- Health equity, equality and non-discrimination
- Feasibility and health system considerations
- Financial and economic considerations
- Balance of health benefits and harms
- Values and preferences

## Factors

|                                                | Notes | Quotes/page number |
|------------------------------------------------|-------|--------------------|
| Acceptability                                  |       |                    |
| Health equity, equality and non-discrimination |       |                    |
| Feasibility and health system considerations   |       |                    |
| Financial and economic considerations          |       |                    |
| Balance of health benefits and harms           |       |                    |
| Values and preferences                         |       |                    |

## References to review

## Appendix B: Included publications and study details

| Source                       | Country                                                           | Data collection year | Intervention                                                                                                                                                                                                                                                                                                                                                            | Study population                                                                                                     | Contextual Factors                            |
|------------------------------|-------------------------------------------------------------------|----------------------|-------------------------------------------------------------------------------------------------------------------------------------------------------------------------------------------------------------------------------------------------------------------------------------------------------------------------------------------------------------------------|----------------------------------------------------------------------------------------------------------------------|-----------------------------------------------|
| ACCESS-SMC Partnership, 2020 | Burkina Faso, Chad, The Gambia, Guinea, Mali, Niger, and Nigeria. | 2015-2016            | SMC for children 3-59 months with 4 cycles of SPAQ delivered door-to-door, DOT for dose 1 then caregivers gave doses 2 and 3 unobserved                                                                                                                                                                                                                                 | 3,650,455 children                                                                                                   | Equity; Feasibility; Financial considerations |
| Ahorlu, C. et al., 2011      | Ghana                                                             | 2007-2009            | IPTc (not given seasonally) for children 6-60 months, with 6 cycles of ASAQ given over 24 months (every 4 months, July, November, March) delivered door-to-door, DOT for all doses                                                                                                                                                                                      | Eligible children. cycle 1: 413 cycle 2:420 cycle 3:433 cycle 4:415 cycle 5:419 cycle 6:421                          | Feasibility                                   |
| Ansah, P. et al., 2016       | Ghana                                                             | 2015                 | SMC for children under 5<br>Drug, delivery method and DOT not specified                                                                                                                                                                                                                                                                                                 | 50 interviews and 8 focus group discussions with parents, guardians, community health workers, and health volunteers | Acceptability                                 |
| Ansah, P. et al. , 2021      | Ghana                                                             | 2015                 | SMC for children 3-59 months with 4 cycles of SPAQ delivered door-to-door, DOT for dose 1 then caregivers gave doses 2 and 3 unobserved                                                                                                                                                                                                                                 | 731 children in the intervention district and 708 children from the control district                                 | Acceptability                                 |
| Antwi, G. et al., 2016       | Ghana                                                             | 2012-2013            | SMC for children 3 months to 5 years with 5 cycles SPAQ, distribution included an announcement for caregivers to pick up medicines from a distribution site for administration to children at home by their caregiver. CHWs completed follow up with home delivery for parents who missed the pick-up with DOT for dose 1 then caregivers gave doses 2 and 3 unobserved | Thirteen in-depth interviews and eight focus group discussions with caregivers                                       | Acceptability; Equity; Feasibility            |

|                                          |                                                                        |           |                                                                                                                                                                                                               |                                                                                                                                                                                                                                                                                                              |                                                              |
|------------------------------------------|------------------------------------------------------------------------|-----------|---------------------------------------------------------------------------------------------------------------------------------------------------------------------------------------------------------------|--------------------------------------------------------------------------------------------------------------------------------------------------------------------------------------------------------------------------------------------------------------------------------------------------------------|--------------------------------------------------------------|
| Armstrong Schellenberg, JR et al. , 2010 | Tanzania                                                               | 2005-2006 | IPTi for infants 2-11 months with a single dose of SP at 2, 3, and 9 months integrated with EPI                                                                                                               | 599 children (340 intervention and 259 control), 5,734 households (surveyed after intervention period), 135 HCF (65 intervention and 70 comparison facilities surveyed during intervention period)                                                                                                           | Acceptability; Feasibility                                   |
| Audibert, C. & Tchouatieu, A. , 2021     | Cameroon, DRC, Ghana, Nigeria, Senegal, Sierra Leone, Tanzania, Uganda | 2019      | IPTi and SMC (country specific drugs and dosing schedule)                                                                                                                                                     | Interviews conducted with community health workers (CHWs), health center managers, parents of children receiving chemoprevention, and national decision makers. The final sample for the field survey consisted of 94 health center managers, 46 community health workers, 14 key informants, and 25 parents | Acceptability; Feasibility                                   |
| Ba, E. et al., 2018                      | Senegal                                                                | 2006-2010 | SMC for children 3-119 months (Early years pilot study restricted to children 2-59 months) with 3 cycles of SPAQ delivered door-to-door, DOT for dose 1 then caregivers gave doses 2 and 3 unobserved         | Interviews with mothers, interview and focus group discussions with health workers and community members                                                                                                                                                                                                     | Acceptability; Equity; Feasibility; Financial considerations |
| Balla, K et al. , 2022                   | Benin, The Gambia, Ghana and Nigeria                                   | 2015-2021 | SMC with SPAQ for up to 5 cycles but number of doses and delivery strategy varies by country                                                                                                                  | Health care workers *study evaluated the use of a digital data collection system.                                                                                                                                                                                                                            | Feasibility; Financial considerations                        |
| Barry, A. et al., 2018                   | Mali                                                                   | 2014      | SMC for children 3-59 months with 3 cycles of SPAQ using multiple delivery strategies, door-to-door or fixed-point distribution further divided by directly observed therapy or non-directly observed therapy | Interviews of 1588 mothers of children who received SMC                                                                                                                                                                                                                                                      | Acceptability; Feasibility                                   |
| Bicaba, A. et al., 2020                  | Burkina Faso                                                           | 2017-2018 | SMC for children 3-59 months with 4 cycles delivered door-to-door<br>Drug and DOT not specified                                                                                                               | Questionnaire completed by 612 Community Based Distributors (CBD)                                                                                                                                                                                                                                            | Feasibility                                                  |
| Bojang, K. et al., 2011                  | Gambia                                                                 | 2006-2007 | IPTc (SMC) for children 6 months to 6 years with 3 cycles of SPAQ delivered to villages by Reproductive and Child Health                                                                                      | Interviews with 390 caregivers<br>12,326 children received SPAQ                                                                                                                                                                                                                                              | Equity; Feasibility;                                         |

|                               |                      |           |                                                                                                                                                                                         |                                                                                                                                                                                                                                       |                                         |
|-------------------------------|----------------------|-----------|-----------------------------------------------------------------------------------------------------------------------------------------------------------------------------------------|---------------------------------------------------------------------------------------------------------------------------------------------------------------------------------------------------------------------------------------|-----------------------------------------|
|                               |                      |           | (RCH) trekking teams at a trekking clinic (mobile point) or Village Health Workers, DOT for dose 1 then caregivers gave doses 2 and 3 unobserved                                        |                                                                                                                                                                                                                                       | Financial considerations                |
| Bonkougou, M., et al., 2018   | Burkina Faso         | 2017      | SMC for children 3-59 months with 4 cycles of SPAQ delivered door-to-door, DOT for dose 1 then caregivers gave doses 2 and 3 unobserved                                                 | 58246 children treated in Boromo and 50,007 at Dano.                                                                                                                                                                                  | Feasibility                             |
| Ceesay, S. et al., 2016       | Gambia               | 2015      | SMC for children 3-59 months with 4 cycles of SPAQ delivered door-to-door,                                                                                                              | Surveys of 1174 children under 7                                                                                                                                                                                                      | Feasibility                             |
| Chandramohan, D. et al., 2007 | Ghana                | 2000-2004 | IPTi for infants under 1 year with SP given at DPT-2, DPT-3, and measles vaccination visits and at 12 months of age, integrated with EPI                                                | Infants 2-12 months old                                                                                                                                                                                                               | Equity; Feasibility                     |
| Chatio, S. et al., 2019       | Ghana                | 2015      | SMC for children 3 months to 5 years with 4 cycles of SPAQ delivered door-to-door, DOT for dose 1 then caregivers gave doses 2 and 3 unobserved                                         | 10 in depth interviews with health volunteers 20 in depth interviews with mothers 8 Focus group discussions with mothers and fathers with children <5                                                                                 | Acceptability; Feasibility              |
| Cisse, B. et al., 2016        | Senegal              | 2008-2010 | SMC for children 3-59 months (expanded to 10 years of age for 2009 and 2010) with 3 cycles of SPAQ delivered door-to-door, DOT for dose 1 then caregivers gave doses 2 and 3 unobserved | In-depth interviews were held with mothers and carers, community leaders, community health workers, health post nurses, and district medical staff (54 health posts children served: 14,000 in 2008; 90,000 in 2009; 160,000 in 2010) | Acceptability; Financial considerations |
| Cisse, B. et al., 2009        | Senegal              | 2008      | IPTc (SMC) for children 2-59 months for 3 cycles with SP+AQ or DHA+PQ or SP+PQ delivered door-to-door, DOT for dose 1 then caregivers gave doses 2 and 3                                | 1893 children                                                                                                                                                                                                                         | Acceptability; Financial considerations |
| Compaore, R. et al., 2017     | Burkina Faso         | 2014-2015 | SMC for children 3-59 months with 4 cycles of SPAQ delivered door-to-door, DOT for dose 1 then caregivers gave doses 2 and 3 unobserved                                                 | 284 caregiver surveys, 21 interviews (3 district managers, 6 former HCW, 6 CD and 6 caregivers)                                                                                                                                       | Acceptability; Feasibility              |
| Conteh, L. et al., 2010       | Tanzania, Mozambique | 2006-2007 | IPTi                                                                                                                                                                                    | Household interviews                                                                                                                                                                                                                  | Financial considerations                |

|                           |                            |           |                                                                                                                                                                                                                                                                                                                                                                                                                                |                                                                                                                                                                                                                                                                    |                                       |
|---------------------------|----------------------------|-----------|--------------------------------------------------------------------------------------------------------------------------------------------------------------------------------------------------------------------------------------------------------------------------------------------------------------------------------------------------------------------------------------------------------------------------------|--------------------------------------------------------------------------------------------------------------------------------------------------------------------------------------------------------------------------------------------------------------------|---------------------------------------|
|                           | ue, Gabon, Kenya, Ghana    |           | Tanzania: SP, CD3, MQ or placebo given at 2,3 and 9 months integrated with EPI.<br>Mozambique: SP given at 3, 4, and 9 months integrated with EPI<br>Gabon: SP given at 3, 9 and 15 months with EPI<br>Kenya: SP-AS, ASAQ, CD3 or placebo given at 2, 3, and 9 months integrated with EPI<br>Ghana: SP or placebo given at 3, 9 and 15 months or placebo given at 3,4,9 and 12 months integrated with EPI<br>DOT not specified |                                                                                                                                                                                                                                                                    |                                       |
| Conteh, L. et al., 2010   | Ghana                      | 2005      | IPTc (SMC) for children 3-59 months with SP given every two months for 6 months, ASAQ every two months for 6 months, ASAQ monthly or placebo delivered door-to-door for 6 month, DOT for all three doses                                                                                                                                                                                                                       | SP bi-monthly to 613 children, ASAQ bi-monthly to 562 children, ASAQ monthly to 626 children                                                                                                                                                                       | Feasibility; Financial considerations |
| De Sousa, A. et al., 2012 | Benin, Madagascar, Senegal | 2007-2008 | IPTi for infants under 1 year with 3 SP given at 2,3 and 9 months integrated with EPI                                                                                                                                                                                                                                                                                                                                          | 605 in depth interviews conducted (407 caregivers, 198 health workers)<br>51 focus group discussions (46 with caregivers, 5 with health workers)<br>Direct observation done both in households and in the health centers that served 65 700 infants receiving IPTi | Acceptability; Equity; Feasibility    |
| Diawara, H. et al. , 2021 | Mali                       | 2014      | SMC for children 3-59 months with 4 cycles of SPAQ via fixed point distribution, DOT for dose 1 then caregivers gave doses 2 and 3 unobserved                                                                                                                                                                                                                                                                                  | SMC to 104,255 children                                                                                                                                                                                                                                            | Financial considerations              |
| Dicko, A. et al., 2011    | Mali                       | 2006-2007 | IPTi for infants under 1 year with SP given at DPT2, DPT3 and measles/Yellow fever vaccination integrated with EPI                                                                                                                                                                                                                                                                                                             | Baseline 1050 children, post-intervention 1051 in the intervention zone and 1055 in control zone                                                                                                                                                                   | Acceptability; Feasibility            |

|                                                    |                                                                 |      |                                                                                                                                                                                         |                                                                                                                                                                                                                                                                                                  |                                                                                      |
|----------------------------------------------------|-----------------------------------------------------------------|------|-----------------------------------------------------------------------------------------------------------------------------------------------------------------------------------------|--------------------------------------------------------------------------------------------------------------------------------------------------------------------------------------------------------------------------------------------------------------------------------------------------|--------------------------------------------------------------------------------------|
| Druetz, T et al., 2018                             | Burkina Faso                                                    | 2015 | SMC for children 3-59 months with 4 cycles of SPAQ delivered door-to-door, DOT not specified                                                                                            | 1,311 households surveyed with children 3-71 months old                                                                                                                                                                                                                                          | Acceptability; Equity; Feasibility                                                   |
| Gilmartin, C. et al., 2021                         | Burkina Faso, Chad, Guinea, Mali, Niger, Nigeria and The Gambia | 2016 | SMC for children under 5 years with 4 cycles of SPAQ, delivery strategy varied by country (fixed-point, mobile-point, door-to-door, mixed-methods), DOT not specified                   | Financial evaluation                                                                                                                                                                                                                                                                             | Feasibility; Financial considerations                                                |
| Gysels, M. et al., 2009                            | Kenya, Tanzania, Gabon, Ghana, Malawi                           |      | IPTi for infants up to 15 months with SPAQ, SP alone or SP + mefloquine (MQ) given at 3,4,9 months or 3,9 15 months or 2,3,9 months or 10 weeks, 14 weeks 9 months, integrated with EPI | Structured questionnaires (1,296), semi-structured interviews (168), in-depth interviews (748) and focus group discussions (95) with mothers, fathers, health workers, community members, opinion leaders, and traditional healers. Participant observation was also carried out in the clinics. | Acceptability; Equity; Feasibility; Financial considerations; Values and preferences |
| Hutton G. et al., 2009                             | Mozambique and Tanzania                                         |      | IPTi for infants under 9 months with SP integrated with EPI                                                                                                                             | Financial evaluation                                                                                                                                                                                                                                                                             | Financial considerations                                                             |
| Issiaka, D., et al., 2015                          | Mali                                                            |      | SMC for children 3-59 months with 3 cycles of SPAQ delivered door-to-door or fixed-point, both DOT and non-DOT strategies implemented                                                   | 32 villages, 2,132 children                                                                                                                                                                                                                                                                      | Feasibility                                                                          |
| Koko, D., Maazou, A., Jackou, H. & Eddis, C., 2022 | Niger                                                           | 2020 | SMC for children 3-59 months for 4 cycles of SPAQ delivered door-to-door, DOT for dose 1 then caregivers gave doses 2 and 3 unobserved                                                  | Caregivers interviewed                                                                                                                                                                                                                                                                           | Acceptability; Feasibility; Values and preferences                                   |
| Kombate, G. et al., 2019                           | Burkina Faso                                                    | 2017 | SMC for children 3-59 months for 3 cycles of SPAQ delivered door-to-door, DOT for                                                                                                       | 28 CHWs were observed, 34 in-depth interviews (28 CHWs, 4 head nurses, 2 community leaders)                                                                                                                                                                                                      | Acceptability; Feasibility                                                           |



|                                        |              |           |                                                                                                                                                                                       |                                                                                                                                                                                                               |                                               |
|----------------------------------------|--------------|-----------|---------------------------------------------------------------------------------------------------------------------------------------------------------------------------------------|---------------------------------------------------------------------------------------------------------------------------------------------------------------------------------------------------------------|-----------------------------------------------|
|                                        |              |           | dose 1 then caregivers gave doses 2 and 3 unobserved                                                                                                                                  |                                                                                                                                                                                                               |                                               |
| Konate, D. et al., 2022                | Mali         | 2019      | SMC for children 5-14 years for 5 cycles of SPAQ via fixed-point delivery                                                                                                             | 350 children                                                                                                                                                                                                  | Acceptability; Feasibility                    |
| Kpormegbe, S. K. & Ahorlu, C. K., 2014 | Ghana        | 2007-2009 | IPTc (Not given seasonally) for children 6-60 months with SPAQ every 4 months from July 2007 until March 2009 delivered door-to-door, DOT for all doses                               | Semi-structured questionnaires with 105 caregivers, focus group discussion with 9 community assistants, 16 in-depth interviews with opinion leaders                                                           | Acceptability; Feasibility                    |
| Kweku, M. et al., 2009                 | Ghana        | 2006      | IPTc (SMC) for children 3-59 months with 4 cycles of SPAQ (May, June, Sept. Oct.) delivered door-to-door or fixed-point, DOT for dose 1 then caregivers gave doses 2 and 3 unobserved | 964 children                                                                                                                                                                                                  | Equity; Feasibility; Financial considerations |
| Lahuerta, M. et al., 2021              | Sierra Leone | 2017-2018 | IPTi for infants under 9 months with SP given at 10 weeks, 14 weeks and 9 months, integrated with EPI                                                                                 | 18 Health facility surveys, 18 maternal and child health aids, one community health assistant and one immunization officer completed the KAP survey, 433 households surveyed, 395 child health cards verified | Acceptability; Equity; Feasibility            |
| Maccario R. et al., 2017               | Mali         | 2010-2012 | IPTsc for children in grades 1-6 with one cycle of SP+AS delivered at school, DOT not specified                                                                                       | Economic evaluation (40 schools, 6413 children)                                                                                                                                                               | Financial considerations                      |
| Makenga, G. et al., 2023               | Tanzania     | 2020      | IPTsc for children 5-15 years with DP every 4 months (March, July & November) delivered at school, DOT for all doses                                                                  | 24 wards (4032 children)                                                                                                                                                                                      | Acceptability; Equity; Feasibility            |
| Manzi, F. et al., 2008                 | Tanzania     | 2004-2008 | IPTi for infants under 9 months with SP given at 2, 3, and 9 months integrated with EPI                                                                                               | Financial evaluation                                                                                                                                                                                          | Financial considerations                      |
| Manzi, F. et al., 2009                 | Tanzania     | 2004-2005 | IPTi for infants under 9 months with SP given at 2, 3, and 9 months integrated with EPI                                                                                               | Focus groups and in-depth interviews at the village level, individual consultations with national, regional and district health staff for pre-testing branding materials; In-depth interviews with            | Feasibility; Financial considerations         |

|                            |                              |           |                                                                                                                                                              |                                                                                                                                                                                                                                                          |                                                            |
|----------------------------|------------------------------|-----------|--------------------------------------------------------------------------------------------------------------------------------------------------------------|----------------------------------------------------------------------------------------------------------------------------------------------------------------------------------------------------------------------------------------------------------|------------------------------------------------------------|
|                            |                              |           |                                                                                                                                                              | nursing staff concerning IPTi implementation; Shadowing clinic staff for time-in-motion study                                                                                                                                                            |                                                            |
| Matangila, J. et al., 2017 | Democratic Republic of Congo | 2014-2015 | IPTsc for school age children with SP (single treatment), SP+PQ (PQ given as 2 doses), or no-treatment every 4 months delivered at school, DOT for all doses | 80 focus group discussions with parents and 6 semi-structured interviews with teachers and directors                                                                                                                                                     | Acceptability; Equity; Feasibility; Values and preferences |
| Moukenet, A. et al., 2022  | Chad                         | 2019      | SMC for children 5-10 years with 4 cycles of SPAQ, delivered door-to-door, DOT for dose 1 then caregivers gave doses 2 and 3 unobserved                      | Routine LQAS monitoring surveys of 90 caregivers of children 3-59 months from cycle 1, 100 from cycle three and 101 from cycle four. 14 Key informant interviews with policy makers and donor representatives. 4 Focus group discussions with caregivers | Acceptability; Feasibility; Financial considerations       |
| Mushi, A. et al., 2008     | Tanzania                     | 2004-2005 | IPTi for infants under 9 months with SP given at 2, 3 and 9 months, integrated with EPI                                                                      | 52 Focus group discussions and 8 open ended interviews with community members and health workers                                                                                                                                                         | Acceptability; Feasibility                                 |
| Ndiaye J L. et al., 2019   | Senegal                      | 2011      | SMC for children 3 months to 9 years with 5 cycles of SPAQ delivered door-to-door, DOT for dose 1 then caregivers gave doses 2 and 3 unobserved              | Twenty-four villages, including 2,301 children aged 3–59 months and 2,245 aged 5–9 years                                                                                                                                                                 | Acceptability; Feasibility                                 |
| Nonvignon J. et al., 2016  | Ghana                        | 2015      | SMC for children 3-59 months with 4 cycles of SPAQ delivered door-to-door, DOT for all doses                                                                 | 112 volunteers and 517 caregivers were interviewed                                                                                                                                                                                                       | Feasibility; Financial considerations                      |
| Ogbulafor, N. et al., 2023 | Nigeria                      | 2021-2022 | SMC for children 3-59 months for 3 or 4 cycles with SPAQ either door-to-door or fixed-point delivery, DOT not specified                                      | 84 focus group discussions with caregivers and 106 interviews community leaders and community drug distributors                                                                                                                                          | Acceptability; Feasibility                                 |
| Okereke, E. et al., 2023   | Nigeria.                     | 2021      | SMC for children 3-59 months with 4 cycles of SPAQ delivered door-to-door, DOT for dose 1 then caregivers gave doses 2 and 3 unobserved                      | 20 semi-structure interviews with stakeholders from national, state, local government and community levels                                                                                                                                               | Equity; Feasibility; Acceptability                         |

|                              |                       |      |                                                                                                                                                                     |                                                                                                                                                                                                                                                                                                                                                                    |                                                            |
|------------------------------|-----------------------|------|---------------------------------------------------------------------------------------------------------------------------------------------------------------------|--------------------------------------------------------------------------------------------------------------------------------------------------------------------------------------------------------------------------------------------------------------------------------------------------------------------------------------------------------------------|------------------------------------------------------------|
| Oresanya, O. et al., 2019    | Nigeria               | 2018 | SMC for children 3-59 months with 4 cycles of SPAQ delivered door-to-door, DOT for dose 1 then caregivers gave doses 2 and 3 unobserved                             | Interviews with caregivers from 4090 households                                                                                                                                                                                                                                                                                                                    | Feasibility                                                |
| Oresanya, O. et al., 2022    | Nigeria               | 2019 | SMC + Vitamin A supplementation for children 6-59 months with 4 cycles of SPAQ delivered door-to-door, DOT for dose 1 then caregivers gave doses 2 and 3 unobserved | 12 key informant interviews with federal ministry of health (3), state representatives, (4), LGA health department (1) and technical partners (4). 12 Focus group discussions with caregivers (4), community drug distributors (CDD) (4) and CDD supervisors (4). Household questionnaires for caregivers of children ages 3-59 months (baseline 188, endline 197) | Acceptability; Feasibility                                 |
| Patouillard, E. et al., 2011 | Ghana                 | 2006 | IPTc (SMC) for children 3-59 months with 4 cycles of SPAQ delivered door-to-door, or fixed-point, DOT not specified                                                 | Economic evaluation (248 children in outpatient departments arm, 244 in the EPI arm and 472 in the Community-based delivery arm)                                                                                                                                                                                                                                   | Acceptability; Feasibility; Financial considerations       |
| Pell, C. et al., 2010        | Papua New Guinea      | 2008 | IPTi for infants under 12 months with SP+AQ or SP+AS given at 3,6,9 and 12 months, integrated with EPI                                                              | In-depth interviews with 23 participant mothers, 2 mother refusers, 2 health workers, 2 village reporters, 2 opinion leaders, 213 questionnaires from participant mothers, focus group discussion with 6 community members                                                                                                                                         | Acceptability; Feasibility                                 |
| Pitt, C. et al., 2012        | Burkina Faso and Mali | 2009 | IPTc (SMC) for children 3-59 months with 3 cycles of SPAQ via fixed-point delivery, DOT for all doses                                                               | 24 interviews with community health workers (CHWs), 48 interviews with caregivers, 8 focus group discussions (FGDs) with 54 CHWs, 15 FGDs with 100 caregivers                                                                                                                                                                                                      | Acceptability; Equity; Feasibility; Values and preferences |
| Pitt, C. et al., 2017        | Senegal               | 2010 | SMC for children 3 -119 months with 3 cycles of SPAQ delivered door-to-door, DOT for dose 1 then caregivers gave doses 2 and 3 unobserved                           | economic evaluation. Questionnaires from 46 health posts, 4 district headquarters and 405 community health workers                                                                                                                                                                                                                                                 | Feasibility; Financial considerations                      |

|                                                                         |                  |           |                                                                                                                                                                                                                                         |                                                                                                                                                                                        |                                    |
|-------------------------------------------------------------------------|------------------|-----------|-----------------------------------------------------------------------------------------------------------------------------------------------------------------------------------------------------------------------------------------|----------------------------------------------------------------------------------------------------------------------------------------------------------------------------------------|------------------------------------|
| Pool, R. et al., 2006                                                   | Mozambique       |           | IPTi for infants under 9 months with SP given at 3, 4 and 9 months, integrated with EPI                                                                                                                                                 | 308 interviews with mothers/caretakers of infants (266 who participated in IPTi 42 who refused/dropped out early)                                                                      | Acceptability                      |
| Pool, R. et al., 2008                                                   | Tanzania         | 2005-2007 | IPTi with SP integrated with EPI, dose schedule not specified                                                                                                                                                                           | 70 debriefing interviews, 96 in-depth interviews, 44 focus group discussions, and participant observation (ethnographic study) of caregivers, healthcare workers and community members | Acceptability; Equity; Feasibility |
| Rehman, A. et al., 2019 (same intervention as Staedke, S. et al., 2018) | Uganda           | 2014      | IP Tsc for children 5-15 years, up to 6 cycles of DP given monthly delivered at school                                                                                                                                                  | 23,280 children registered in 42 intervention schools                                                                                                                                  | Equity; Feasibility                |
| Ross, A. et al., 2011                                                   |                  | 2009      | IPTi for infants under 9 months with SP given at 3,4, and 9 months integrated with EPI.<br><br>IPTc (SMC) for children 3 months to 5 years for 3 monthly doses or every 2 months throughout the year with SP or ASAQ, DOT not specified | Economic evaluation                                                                                                                                                                    | Financial considerations           |
| Shehu, U. L., et al., 2017                                              | Nigeria          |           | SMC for unspecified population                                                                                                                                                                                                          | 325 households in each LGA, 6 focus group discussions.                                                                                                                                 | Acceptability, equity              |
| Sicuri, E. et al., 2011                                                 | Gabon            | 2007      | IPTi for infants under 15 months with SP given at 3, 9, and 15 months, integrated with EPI                                                                                                                                              | economic evaluation 1011 infants (504 SP 507 Placebo)                                                                                                                                  | Financial considerations           |
| Sottas, O. et al., 2019                                                 | Papua New Guinea | 2006-2010 | IPTi for infants under 12 months with SP+AQ or SP+AS or placebo given at 3,6,9 and 12 months, integrated with EPI                                                                                                                       | 206 children                                                                                                                                                                           | Feasibility                        |
| Staedke, S. et al., 2018 (same                                          | Uganda           | 2014      | IP Tsc for children 5-20 years old with up to 6 cycles of DP delivered at school, DOT for all doses                                                                                                                                     | 23,280 children registered in 42 intervention schools                                                                                                                                  | Equity; Feasibility                |

|                                          |              |           |                                                                                                                                                    |                                                                                                                                                                                                                                                                                                                                                                                        |                                                      |
|------------------------------------------|--------------|-----------|----------------------------------------------------------------------------------------------------------------------------------------------------|----------------------------------------------------------------------------------------------------------------------------------------------------------------------------------------------------------------------------------------------------------------------------------------------------------------------------------------------------------------------------------------|------------------------------------------------------|
| intervention as Rehman, A. et al., 2019) |              |           |                                                                                                                                                    |                                                                                                                                                                                                                                                                                                                                                                                        |                                                      |
| Strachan, C. et al., 2016                | Nigeria      | 2013      | SMC for children 3-59 months with 4 cycles of SPAQ delivered door-to-door (rural areas) or fixed-point (urban areas), DOT not specified            | 36 individual interviews and 18 focus group discussions (54 participants) with State government, LGA leadership, primary healthcare & malaria staff, UN agency & active international and local NGOs, health facility representatives, traditional and religious community leaders, village health committees, CCGs, CBOs, head of household (males), caregivers of children (females) | Acceptability; Feasibility                           |
| Temperley, M. et al., 2008               | Kenya        | 2005-2006 | IPTsc for children 5-18 years with SPAQ every 4 months (once per school term) delivered at school, DOT for all doses                               | economic evaluation (74,000 school children)                                                                                                                                                                                                                                                                                                                                           | Acceptability; Feasibility; Financial considerations |
| Tine, R. et al, 2013                     | Senegal      | 2010-2011 | SMC for children 1-10 years old with 2 cycles of SPAQ via fixed-point delivery with at home follow up if a child misses a visit, DOT for all doses | 255 surveys, 61 in depth interviews, 6 focus group discussions (village association, health committee, women's groups, households, caregivers, community leaders, CHWs/CHW assistants)                                                                                                                                                                                                 | Acceptability; Feasibility                           |
| Tine, R. et al., 2014                    | Senegal      | 2010-2011 | SMC for children 3-119 months with 3 cycles (2010 only 2 cycles completed) of SPAQ delivered door-to-door, DOT for all doses                       | 1006 children in 2010 and 992 children in 2011 completed 8 weeks of follow up                                                                                                                                                                                                                                                                                                          | Feasibility                                          |
| Traore, A. et al., 2022                  | Burkina Faso | 2019      | SMC for children 3-59 months with 4 or 5 cycles of SPAQ delivered door-to-door, DOT for dose 1 then caregivers gave doses 2 and 3 unobserved       | 4 focus group discussions with community distributors, 4 focus group discussions with caregivers of children under 5, Household surveys at the end of cycles, lot quality assurance sampling to assess adherence                                                                                                                                                                       | Acceptability; Feasibility                           |
